# Supplementary material
Source: PubMed Central journal article supplement (PMC8931435)
Supplement: mmc1.pdf [file mmc1.pdf]

## Supporting information

### **Improved SARS-CoV-2 main protease high throughput screening assay using a 5-carboxyfluorescein substrate**

Scott Legare<sup>1,\*</sup>, Fabian Heide<sup>1</sup>, Ben A Bailey-Elkin<sup>1</sup>, Jörg Stetefeld<sup>1,\*</sup>

<sup>1</sup> Department of Chemistry, University of Manitoba, Winnipeg, Manitoba, Canada

\*Corresponding authors:

Scott Legare - legares@myumanitoba.ca

Jörg Stetefeld - jorg.stetefeld@umanitoba.ca

#### Table of Contents

- Figure S1. SDS-PAGE of SARS-CoV-2 M<sup>pro</sup>.
- Table S1. SARS-CoV-2 M<sup>pro</sup> circular dichroism spectra analysis.
- Figure S2. Reaction progress curve for the complete substrate hydrolysis.
- Figure S3. Measurement of  $K_{cat}/K_m$  at substrate concentrations below substrate  $K_m$ .
- Figure S4. Relative fluorescence units produced by fluorophores.

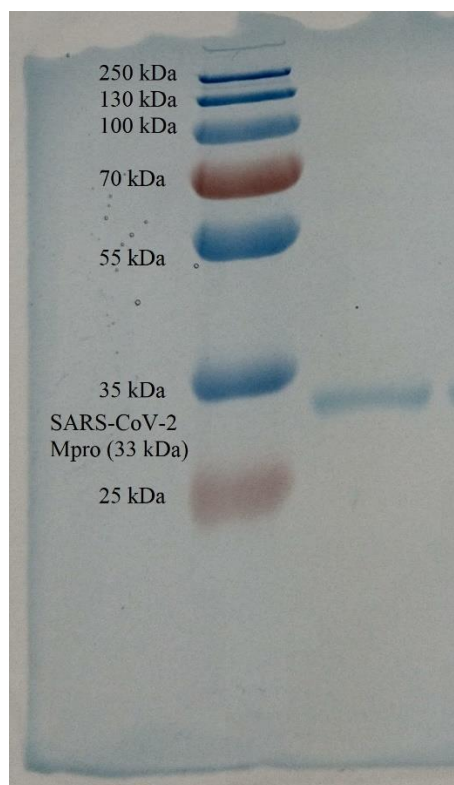

**Figure S1. SDS-PAGE of SARS-CoV-2 M<sup>pro</sup> used for biophysical and enzymatic studies.**

Table S1. SARS-CoV-2 M<sup>pro</sup> circular dichroism spectra analysis.

|                           | Helix (%) | Sheet (%) | Turn (%) | Random coil (%) | Other <sup>c</sup> (%) |
|---------------------------|-----------|-----------|----------|-----------------|------------------------|
| CDSSTR <sup>a</sup>       | 29        | 26        | 19       | 28              |                        |
| PDB ID: 6Y2E <sup>b</sup> | 25        | 27        |          |                 | 48                     |

<sup>a</sup> secondary structure content of CD spectra estimated by CDSSTR algorithm. <sup>b</sup> secondary structure of crystal structure estimated using PDBsum. <sup>c</sup> includes turns and random coils.

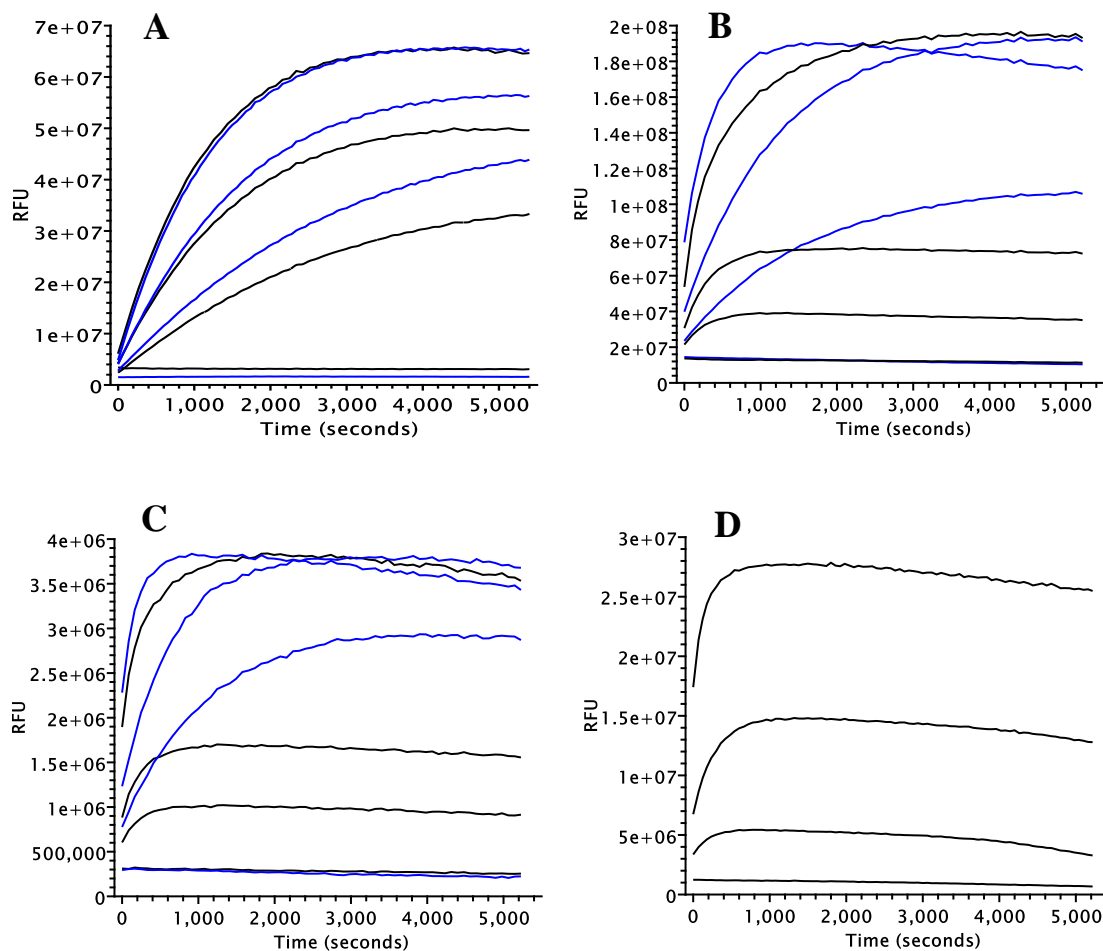

**Figure S2. Reaction progress curve for the complete hydrolysis of substrate.** 20  $\mu\text{M}$  substrate in 20 mM BIS-TRIS pH 7.0 (black lines) and 20 mM BIS-TRIS pH 7.0, 2 mM EDTA, 2mM DTT (blue lines). Each condition was tested at four enzyme concentrations. *A*, For the VKLQ - AMC substrate 0, 2, 4 and 8  $\mu\text{M}$  enzyme was used. *B-D*, For the nsp4-5-FAM, nsp4-5-EDANS, and nsp4-5-MCA substrates 0, 40, 80 and 160 nM enzyme was used. nsp4-5-MCA substrate was inactive in the presence of EDTA. Each curve represents the mean of 3 independent measurements.

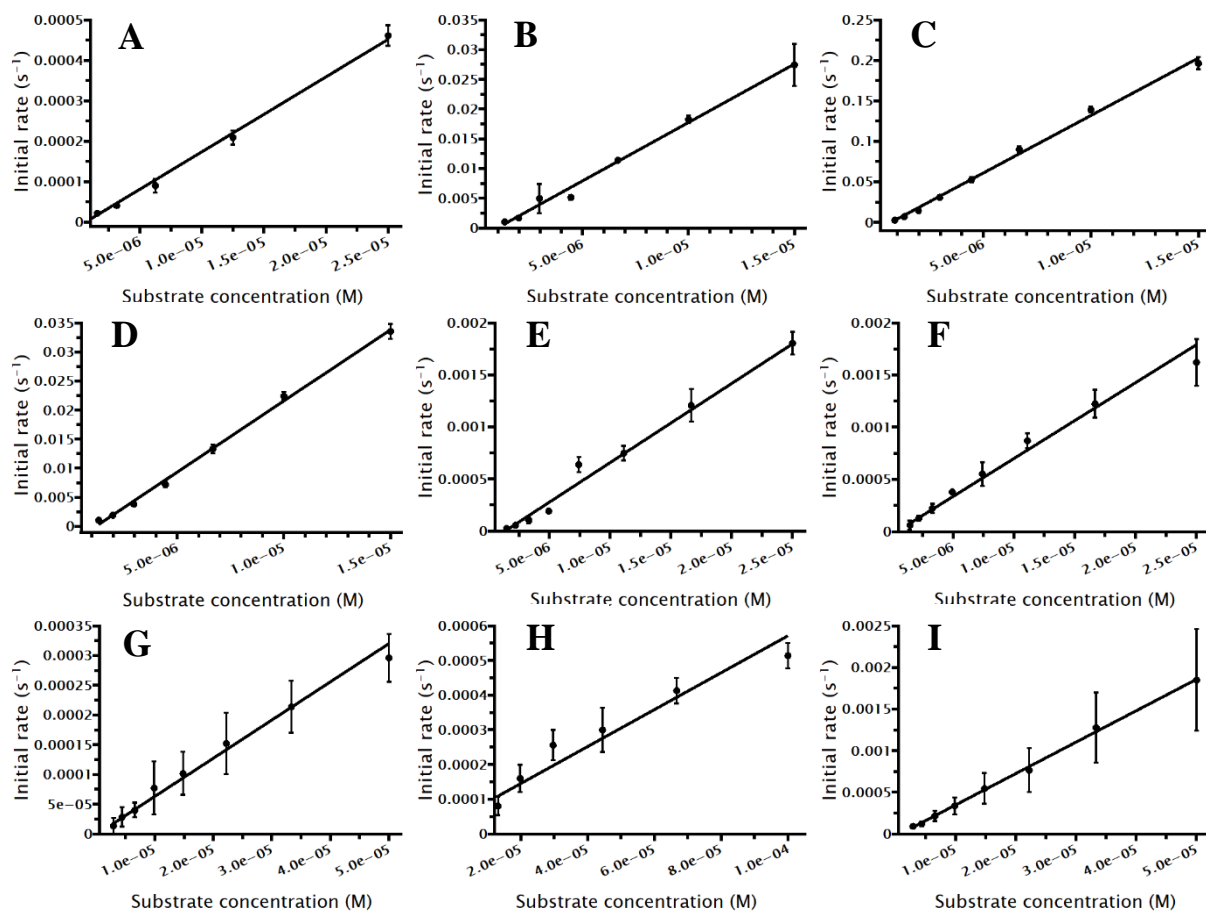

**Figure S3. Measurement of  $K_{cat}/K_m$  at substrate concentrations below substrate  $K_m$ .** Y axis shows the initial rate of product formation per second per enzyme active site in units of  $s^{-1}$ . A, VKLQ - AMC substrate. B, nsp4-5-EDANS substrate. C, nsp4-5-MCA substrate. D, nsp4-5-FAM substrate. E, nsp5-6-FAM substrate. F, nsp6-7-FAM substrate. G, nsp8-9-FAM substrate. H, nsp10-12-FAM substrate. I, nsp14-15-FAM substrate. Each data point is the mean  $\pm$  1 standard deviation,  $n = 3$ .

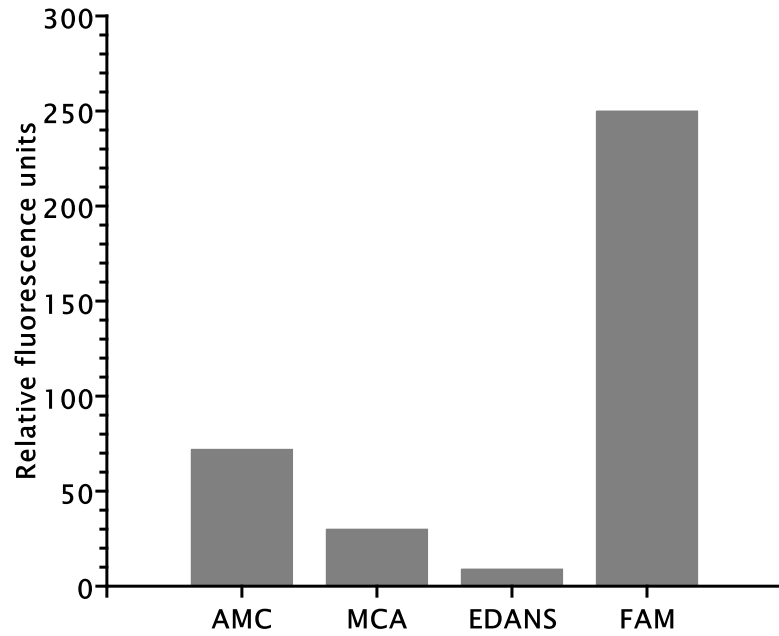

**Figure S4. Relative fluorescence units produced by 100  $\mu$ L of 2  $\mu$ M fluorophore in 20mM BIS-TRIS pH 7.0.** This shows the FAM fluorophore is much brighter in comparison to other fluorophores used in the fluorescent substrates. Values are reported as the mean of 3 measurements.
